# Supplementary material for: Main-Group Metal Complexes of Benzene: Predicted Features of Stabilization and Isomerization
Source: MDPI journal article supplement (doi:10.3390/molecules28165985), 2023-08-10
Supplement: s1 [file s1]

## Main-group metal complexes of benzene: predicted features of stabilization and isomerization

F. Y. Naumkin

**Table S1.** Optimized geometries (coordinates in Å) of studied complexes

Be-Bz (p)

|   |              |              |              |
|---|--------------|--------------|--------------|
| 6 | 1.205369130  | 0.640029930  | 0.358133970  |
| 6 | 1.200507630  | -0.730749230 | 0.133612110  |
| 6 | -0.004835440 | -1.412070530 | 0.022354210  |
| 6 | -1.205358380 | -0.722508880 | 0.135024160  |
| 6 | -1.200499400 | 0.648269200  | 0.359513230  |
| 6 | 0.004837840  | 1.329500780  | 0.471420840  |
| 1 | 2.141672320  | 1.171087180  | 0.432837800  |
| 1 | 2.132999310  | -1.264445690 | 0.034116390  |
| 1 | -0.008507410 | -2.474996260 | -0.163228840 |
| 1 | -2.141649130 | -1.249722480 | 0.036674780  |
| 1 | -2.133000430 | 1.185818330  | 0.435295950  |
| 1 | 0.008457340  | 2.396073230  | 0.634805260  |
| 4 | -0.000045670 | 0.412886960  | -2.520893860 |

Be-Bz (c)

|   |              |              |              |
|---|--------------|--------------|--------------|
| 6 | 0.739629250  | 1.253432060  | 0.165821630  |
| 6 | -0.606953460 | 1.326628720  | 0.136021630  |
| 6 | -1.297303990 | 0.104309410  | -0.314799240 |
| 6 | -0.760945880 | -1.087209060 | 0.384779090  |
| 6 | 0.619045770  | -1.162103920 | 0.416222510  |
| 6 | 1.312495570  | -0.037870240 | -0.256431230 |
| 1 | 1.367596780  | 2.060048750  | 0.512862520  |

|   |              |              |              |
|---|--------------|--------------|--------------|
| 1 | -1.158466840 | 2.197080320  | 0.457810830  |
| 1 | -2.366469260 | 0.123744540  | -0.443773420 |
| 1 | -1.399529880 | -1.887755440 | 0.721925730  |
| 1 | 1.150995440  | -2.025871790 | 0.781285780  |
| 1 | 2.382094240  | -0.135151950 | -0.337905570 |
| 4 | -0.010798870 | -0.688763420 | -1.213421190 |

#### Mg-Bz (p)

|    |              |              |              |
|----|--------------|--------------|--------------|
| 6  | -1.181769870 | 0.784549910  | -0.694570980 |
| 6  | -1.181769870 | 0.784549910  | 0.694570980  |
| 6  | 0.019772300  | 0.725290400  | 1.389183460  |
| 6  | 1.221335890  | 0.666095660  | 0.694580180  |
| 6  | 1.221335890  | 0.666095660  | -0.694580180 |
| 6  | 0.019772300  | 0.725290400  | -1.389183460 |
| 1  | -2.115373200 | 0.827024270  | -1.234007620 |
| 1  | -2.115373200 | 0.827024270  | 1.234007620  |
| 1  | 0.019447650  | 0.720944400  | 2.468287890  |
| 1  | 2.154513930  | 0.615134990  | 1.234044110  |
| 1  | 2.154513930  | 0.615134990  | -1.234044110 |
| 1  | 0.019447650  | 0.720944400  | -2.468287890 |
| 12 | -0.087236890 | -2.392470910 | 0.000000000  |

#### Ca-Bz (p)

|   |              |              |              |
|---|--------------|--------------|--------------|
| 6 | 0.548335620  | -1.021427210 | 1.292973900  |
| 6 | -0.831905550 | -1.026522240 | 1.129763330  |
| 6 | -1.380513620 | -1.071711650 | -0.146199960 |
| 6 | -0.548722760 | -1.109329750 | -1.258723680 |
| 6 | 0.831499490  | -1.104241030 | -1.095572590 |
| 6 | 1.380089750  | -1.061567060 | 0.180462730  |

|    |              |              |              |
|----|--------------|--------------|--------------|
| 1  | 0.973923630  | -0.984931500 | 2.283528150  |
| 1  | -1.477031360 | -0.993898670 | 1.993636010  |
| 1  | -2.451781710 | -1.075855080 | -0.273545100 |
| 1  | -0.974315340 | -1.141725550 | -2.249428600 |
| 1  | 1.476597370  | -1.132569490 | -1.959603700 |
| 1  | 2.451380820  | -1.057749720 | 0.307775170  |
| 20 | 0.000841920  | 2.148841160  | -0.071807330 |

Sr-Bz (p)

|    |              |              |              |
|----|--------------|--------------|--------------|
| 6  | 1.218267470  | -1.527898040 | 0.694029110  |
| 6  | 1.218315840  | -1.530013490 | -0.695987580 |
| 6  | 0.015222260  | -1.570535070 | -1.390995200 |
| 6  | -1.187833480 | -1.609976800 | -0.695946890 |
| 6  | -1.187914560 | -1.607997340 | 0.693970920  |
| 6  | 0.015091500  | -1.566912510 | 1.388947200  |
| 1  | 2.151586320  | -1.490853090 | 1.233346400  |
| 1  | 2.151733100  | -1.495465540 | -1.235271960 |
| 1  | 0.015083640  | -1.568689520 | -2.469541610 |
| 1  | -2.121483250 | -1.639428680 | -1.235127880 |
| 1  | -2.121579440 | -1.635313950 | 1.233257980  |
| 1  | 0.014739640  | -1.560379560 | 2.467505470  |
| 38 | -0.016041830 | 1.578469220  | 0.011814060  |

Ba-Bz (p)

|   |              |             |              |
|---|--------------|-------------|--------------|
| 6 | 1.243718890  | 1.744369470 | 0.695228080  |
| 6 | 1.243700460  | 1.744380160 | -0.695214070 |
| 6 | 0.039566840  | 1.770884220 | -1.390402780 |
| 6 | -1.164574670 | 1.797234370 | -0.695213090 |
| 6 | -1.164593400 | 1.797222840 | 0.695226980  |

|    |              |              |              |
|----|--------------|--------------|--------------|
| 6  | 0.039567280  | 1.770895320  | 1.390383080  |
| 1  | 2.177163540  | 1.713727800  | 1.234444720  |
| 1  | 2.177147800  | 1.713726720  | -1.234442940 |
| 1  | 0.039354110  | 1.761382390  | -2.468783860 |
| 1  | -2.098466460 | 1.807254220  | -1.234445390 |
| 1  | -2.098481250 | 1.807254620  | 1.234447450  |
| 1  | 0.039353290  | 1.761383480  | 2.468773240  |
| 56 | -0.027595940 | -1.243134850 | -0.000001420 |

Ba-Bz (c)

|    |              |              |              |
|----|--------------|--------------|--------------|
| 6  | -0.677627780 | 1.525069090  | -1.209722860 |
| 6  | 0.693061980  | 1.518960070  | -1.204334990 |
| 6  | 1.437722500  | 1.235352990  | 0.007318590  |
| 6  | 0.683496460  | 1.508103790  | 1.215543780  |
| 6  | -0.687194470 | 1.514237040  | 1.210143230  |
| 6  | -1.434319820 | 1.248237990  | -0.003985470 |
| 1  | -1.201367730 | 1.739716120  | -2.131091040 |
| 1  | 1.225901080  | 1.729040390  | -2.121525630 |
| 1  | 2.498217520  | 1.425940310  | 0.012389800  |
| 1  | 1.209084540  | 1.709979840  | 2.138750450  |
| 1  | -1.218194150 | 1.720736560  | 2.129211350  |
| 1  | -2.493052200 | 1.448419040  | -0.007313500 |
| 56 | -0.008282930 | -0.978019300 | -0.008465320 |

Be-Bz-Be (p)

|   |              |              |              |
|---|--------------|--------------|--------------|
| 6 | 0.914354060  | -0.031250390 | 1.043344300  |
| 6 | -0.448825450 | -0.030412070 | 1.312975340  |
| 6 | -1.363822490 | 0.000622190  | 0.267589980  |
| 6 | -0.915673050 | 0.031723390  | -1.047383450 |

|   |              |              |              |
|---|--------------|--------------|--------------|
| 6 | 0.447494170  | 0.030899800  | -1.316994500 |
| 6 | 1.362508500  | -0.001156790 | -0.271662470 |
| 1 | 1.624968300  | -0.055180480 | 1.855089010  |
| 1 | -0.796856710 | -0.053895400 | 2.334137560  |
| 1 | -2.422415480 | 0.000518450  | 0.476886620  |
| 1 | -1.626283390 | 0.055953390  | -1.859106840 |
| 1 | 0.795524940  | 0.054707680  | -2.338147750 |
| 1 | 2.421079150  | -0.002862190 | -0.481056740 |
| 4 | 0.019333650  | 2.873265090  | 0.083524590  |
| 4 | -0.015158670 | -2.873948820 | -0.070722980 |

#### Be-Bz-Be (s)

|   |              |              |              |
|---|--------------|--------------|--------------|
| 6 | 1.284300900  | 0.683435170  | 0.018962040  |
| 6 | 0.056839350  | 1.516823600  | 0.163912390  |
| 6 | -1.076010080 | 0.584032630  | 0.583548740  |
| 6 | -1.078486440 | -0.581770720 | -0.581175330 |
| 6 | 0.053320440  | -1.516942100 | -0.164051560 |
| 6 | 1.282746570  | -0.686165490 | -0.020770960 |
| 1 | 2.239320800  | 1.189440820  | 0.000117010  |
| 1 | 0.161358030  | 2.468977220  | 0.652874690  |
| 1 | -2.041812910 | 1.060625580  | 0.692097230  |
| 1 | -2.045469940 | -1.056461760 | -0.687535380 |
| 1 | 0.155009120  | -2.469176880 | -0.653449960 |
| 1 | 2.236649610  | -1.194289030 | -0.002803890 |
| 4 | -0.476494290 | -0.851695490 | 1.241223180  |
| 4 | -0.477908380 | 0.852832570  | -1.240135640 |

#### Mg-Bz-Mg (p)

|   |              |             |              |
|---|--------------|-------------|--------------|
| 6 | -0.294294470 | 0.000098970 | -1.358489090 |
|---|--------------|-------------|--------------|

|    |              |              |              |
|----|--------------|--------------|--------------|
| 6  | -1.328457900 | 0.008185390  | -0.430157490 |
| 6  | -1.041669640 | 0.008482360  | 0.929588470  |
| 6  | 0.279355000  | 0.000694200  | 1.360891830  |
| 6  | 1.313581270  | -0.007375490 | 0.432620240  |
| 6  | 1.026722230  | -0.007676400 | -0.927125890 |
| 1  | -0.517056980 | -0.000110270 | -2.414315040 |
| 1  | -2.354177910 | 0.014731670  | -0.765248600 |
| 1  | -1.844696520 | 0.015268980  | 1.650449500  |
| 1  | 0.502007920  | 0.000991220  | 2.416756010  |
| 1  | 2.339288610  | -0.013794190 | 0.767721150  |
| 1  | 1.829761660  | -0.014340830 | -1.648008590 |
| 12 | 0.018875070  | 3.178985140  | -0.003893470 |
| 12 | -0.001182400 | -3.180143040 | 0.000957600  |

Ca-Bz-Ca (p)

|    |              |              |              |
|----|--------------|--------------|--------------|
| 6  | 1.203842460  | 0.006170320  | 0.695077070  |
| 6  | 1.203842460  | 0.006170320  | -0.695077070 |
| 6  | -0.000071120 | 0.001113210  | -1.390219990 |
| 6  | -1.203975970 | -0.004025260 | -0.695104560 |
| 6  | -1.203975970 | -0.004025260 | 0.695104560  |
| 6  | -0.000071120 | 0.001113210  | 1.390219990  |
| 1  | 2.138323580  | 0.010587350  | 1.234572390  |
| 1  | 2.138323580  | 0.010587350  | -1.234572390 |
| 1  | 0.000176970  | 0.001045020  | -2.469247930 |
| 1  | -2.138530000 | -0.008824340 | -1.234442060 |
| 1  | -2.138530000 | -0.008824340 | 1.234442060  |
| 1  | 0.000176970  | 0.001045020  | 2.469247930  |
| 20 | -0.011189460 | -3.391484100 | 0.000000000  |
| 20 | 0.024494120  | 3.409516460  | 0.000000000  |

Ca-Bz-Ca (s)

|    |              |              |              |
|----|--------------|--------------|--------------|
| 6  | -0.007161610 | -1.416719440 | -0.004210800 |
| 6  | 1.227507040  | -0.758205640 | -0.003549150 |
| 6  | 1.235063250  | 0.745769470  | -0.003815050 |
| 6  | 0.007161610  | 1.416719440  | -0.004210800 |
| 6  | -1.227507040 | 0.758205640  | -0.003549150 |
| 6  | -1.235063250 | -0.745769470 | -0.003815050 |
| 1  | -0.012656670 | -2.498457120 | -0.004609920 |
| 1  | 2.147003890  | -1.315341930 | -0.003995760 |
| 1  | 2.160138070  | 1.293577030  | -0.003260360 |
| 1  | 0.012656670  | 2.498457120  | -0.004609920 |
| 1  | -2.147003890 | 1.315341930  | -0.003995760 |
| 1  | -2.160138070 | -1.293577030 | -0.003260360 |
| 20 | 0.000000000  | 0.000000000  | 2.186618270  |
| 20 | 0.000000000  | 0.000000000  | -2.195067230 |

Sr-Bz-Sr (p)

|   |              |              |              |
|---|--------------|--------------|--------------|
| 6 | 1.203839830  | -0.025375240 | 0.692536570  |
| 6 | 1.204698810  | -0.022318300 | -0.697973620 |
| 6 | 0.000543450  | -0.002619040 | -1.392878350 |
| 6 | -1.203670390 | 0.014936040  | -0.697589310 |
| 6 | -1.204591330 | 0.012575670  | 0.693141360  |
| 6 | -0.000238220 | -0.007684500 | 1.388024560  |
| 1 | 2.137750780  | -0.041771400 | 1.232641590  |
| 1 | 2.138787010  | -0.035638440 | -1.237240000 |
| 1 | -0.000784730 | -0.000296410 | -2.471850860 |
| 1 | -2.137163520 | 0.030328420  | -1.238149280 |
| 1 | -2.138944320 | 0.026993080  | 1.232479740  |

|    |              |              |             |
|----|--------------|--------------|-------------|
| 1  | 0.001437090  | -0.009653190 | 2.466897070 |
| 38 | -0.061422810 | -3.384236630 | 0.021074110 |
| 38 | 0.065558120  | 3.395838180  | 0.008886410 |

Sr-Bz-Sr (s)

|    |              |              |              |
|----|--------------|--------------|--------------|
| 6  | -0.693416540 | -0.003551900 | -1.262603560 |
| 6  | 0.704507490  | -0.001516020 | -1.224842480 |
| 6  | 1.440353420  | 0.001623220  | -0.035679470 |
| 6  | 0.693538590  | 0.002333380  | 1.262945280  |
| 6  | -0.704323690 | 0.000243540  | 1.225106120  |
| 6  | -1.440208680 | -0.002860930 | 0.035966110  |
| 1  | -1.215968760 | -0.005679330 | -2.203081970 |
| 1  | 1.244068890  | -0.002048370 | -2.162942110 |
| 1  | 2.516045630  | 0.003043820  | -0.057139090 |
| 1  | 1.216176380  | 0.004251990  | 2.203280700  |
| 1  | -1.243781200 | 0.000736930  | 2.163347640  |
| 1  | -2.515865670 | -0.004075660 | 0.057294810  |
| 38 | 0.003356440  | -2.364447230 | 0.003526360  |
| 38 | -0.005138980 | 2.363105420  | -0.004896130 |

Ba-Bz-Ba (p)

|   |              |             |              |
|---|--------------|-------------|--------------|
| 6 | 1.211549000  | 0.048838840 | 0.696121600  |
| 6 | 1.211542800  | 0.048841950 | -0.696115800 |
| 6 | 0.005857140  | 0.057625010 | -1.392230780 |
| 6 | -1.199801150 | 0.069436930 | -0.696121320 |
| 6 | -1.199795160 | 0.069437350 | 0.696123710  |
| 6 | 0.005859950  | 0.057622570 | 1.392235300  |
| 1 | 2.145627500  | 0.041384970 | 1.235393490  |
| 1 | 2.145612910  | 0.041391920 | -1.235402320 |

|    |              |              |              |
|----|--------------|--------------|--------------|
| 1  | 0.005822260  | 0.056622090  | -2.470831090 |
| 1  | -2.133850790 | 0.077919850  | -1.235435660 |
| 1  | -2.133838470 | 0.077919070  | 1.235448550  |
| 1  | 0.005786780  | 0.056618530  | 2.470835230  |
| 56 | -0.022914990 | -3.122482020 | -0.000006160 |
| 56 | 0.030994590  | 3.239068630  | -0.000014740 |

Ba-Bz-Ba (s)

|    |              |              |              |
|----|--------------|--------------|--------------|
| 6  | -1.414118300 | 0.001484160  | -0.004105600 |
| 6  | -0.750141060 | 0.000427810  | 1.224997430  |
| 6  | 0.737336370  | -0.003081620 | 1.228232840  |
| 6  | 1.406197510  | -0.003821010 | 0.001756820  |
| 6  | 0.742430140  | -0.001662090 | -1.227432920 |
| 6  | -0.745016800 | 0.001772580  | -1.230403130 |
| 1  | -2.496259970 | 0.002988400  | -0.006357760 |
| 1  | -1.306155170 | 0.000577780  | 2.146682100  |
| 1  | 1.289386560  | -0.005262200 | 2.152182190  |
| 1  | 2.488433190  | -0.006462210 | 0.003948590  |
| 1  | 1.298295850  | -0.001900810 | -2.149097410 |
| 1  | -1.297201120 | 0.001844610  | -2.154386040 |
| 56 | 0.000219660  | 2.526152960  | 0.000499960  |
| 56 | -0.009255990 | -2.527284580 | -0.001774820 |
